# Supplementary material
Source: PubMed Central journal article supplement (PMC6132258)
Supplement: NIHMS982954-supplement-1.pdf [file NIHMS982954-supplement-1.pdf]

**SUPPLEMENTAL**

**SUPPLEMENTAL TABLE 1:** Linear regression model for the association between maternal characteristics at enrollment and proximal-distal logHCC differences (delta), among 97 participants.

| Maternal characteristic at enrollment | N (%)       | Delta <sup>a</sup> (P-value) | Beta (SE)    | P-value |
|---------------------------------------|-------------|------------------------------|--------------|---------|
| All                                   | 97 (100.0%) | 0.28 (0.016)                 | -            | -       |
| Employed during pregnancy             |             |                              |              |         |
| No                                    | 52 (53.6%)  | 0.49 (0.003)                 | REF          |         |
| Yes                                   | 45 (46.4%)  | 0.04 (0.793)                 | -0.45 (0.23) | 0.05    |
| UV light exposure in first trimester  |             |                              |              |         |
| Low                                   | 20 (20.6%)  | -0.26 (0.246)                | REF          |         |
| Intermediate                          | 61 (62.9%)  | 0.39 (0.017)                 | 0.41 (0.14)  | 0.01    |
| High                                  | 16 (16.5%)  | 0.55 (0.003)                 | 0.65 (0.31)  | 0.04    |
| Prior asthma diagnosis ever           |             |                              |              |         |
| No                                    | 87 (89.7%)  | 0.36 (0.001)                 | REF          |         |
| Yes                                   | 10 (10.3%)  | -0.38 (0.530)                | -0.74 (0.38) | 0.05    |

Abbreviations: SD= standard deviation, SE = standard error, logHCC= log-transformed hair cortisol concentrations

<sup>a</sup> Delta = Proximal logHCC – Distal logHCC

**SUPPLEMENTAL TABLE 2:** Agreement values using batch-corrected immunoassay-derived logHCC values

| <b>Batch-corrected agreement measures</b> |               |
|-------------------------------------------|---------------|
| Difference in mean logHCC (95% CI)        | 0.3 (0.1-0.5) |
| P-value <sup>a</sup>                      | 0.006         |
| Pearson correlation                       | 0.24          |
| P-value                                   | 0.02          |
| Weighted Kappa                            | 0.11          |
| Intra-class correlation                   | 0.42          |

<sup>a</sup> Paired t-test p-values for paired data
